# Supplementary material for: Assessment of the Toxicity of Quantum Dots through Biliometric Analysis
Source: MDPI journal article supplement (doi:10.3390/ijerph18115768), 2021-05-27
Supplement: s1 [file s1]

## Supplementary Materials

### Assessment of the toxicity of quantum dots through a biliometric analysis

Lishi Zhong <sup>†1</sup>, Lili Zhang <sup>†1</sup>, Yimeng Li <sup>†1</sup>, Xue Liang <sup>2</sup>, Lu Kong <sup>1</sup>, Xiaobing Shen <sup>1</sup>, Tianshu Wu <sup>1\*</sup>

<sup>1</sup> Key Laboratory of Environmental Medicine and Engineering, Ministry of Education, School of Public Health, Southeast University, Nanjing 210009, Jiangsu, China.

<sup>2</sup> School of Public Health, Shandong First Medical University & Shandong Academy of Medical Sciences, Jinan, P.R.China.

\* Correspondence: [ninatwu@126.com](mailto:ninatwu@126.com) / [ninatwu@seu.edu.cn](mailto:ninatwu@seu.edu.cn)

<sup>†</sup> The authors contributed equally to the work.

The terms used for data retrieval:

(1) (TOPIC: ("quantum dot") or TOPIC: ("quantum dots") or TOPIC: ("nano dots") or TOPIC: ("nanocrystals") or TOPIC: ("nanoscale semiconductor") or TOPIC: ("QD") or TOPIC: ("QDs") or TOPIC: ("QD(s)") or TOPIC: ("Semiconductor Nanoparticle") or TOPIC: ("Semiconductor Nanocrystal")) and (TOPIC: ("toxicity") or TOPIC: ("toxicology") or TOPIC: ("toxicological") or TOPIC: ("toxic") or TOPIC: ("nanotoxic") or TOPIC: ("nanotoxicity") or TOPIC: ("nanotoxicological") or TOPIC: ("toxicologic") or TOPIC: ("adverse effect") or TOPIC: ("adverse health effect") or TOPIC: ("nanotoxicology") or TOPIC: ("toxic effect") or TOPIC: ("poisonous") or TOPIC: ("poison") or TOPIC: ("detrimental effect") or TOPIC: ("survival rate") or TOPIC: ("health hazard"))).

(2) All references were from 2009 to 2018.

(3) Languages were English.

(4) Literature Types were articles or reviews.
